# Supplementary material
Source: PubMed Central journal article supplement (PMC4587360)

### OVSAHO

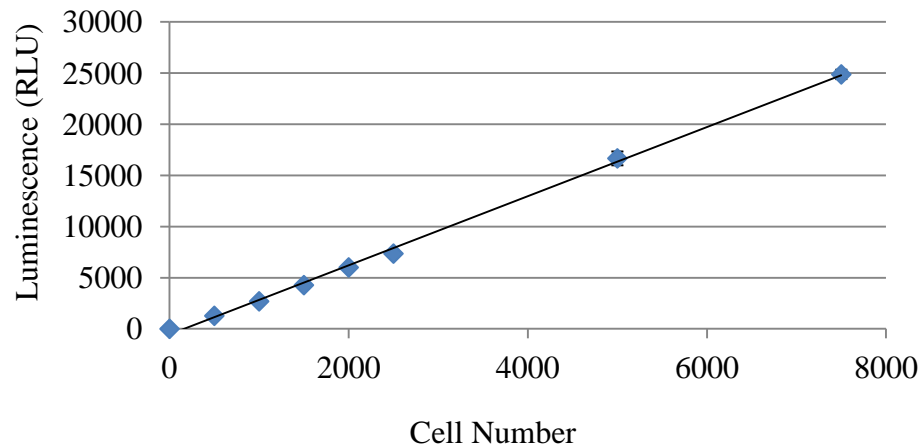

### SKOV3

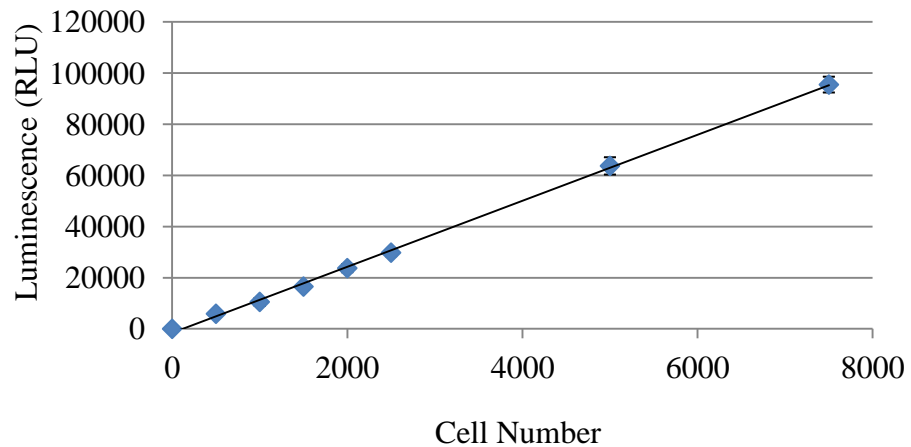

### KURAMOCHI

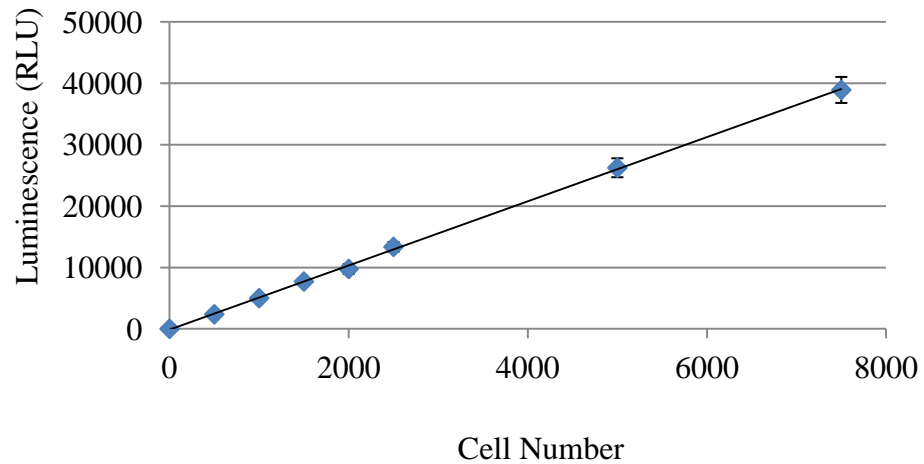

Figure S1.

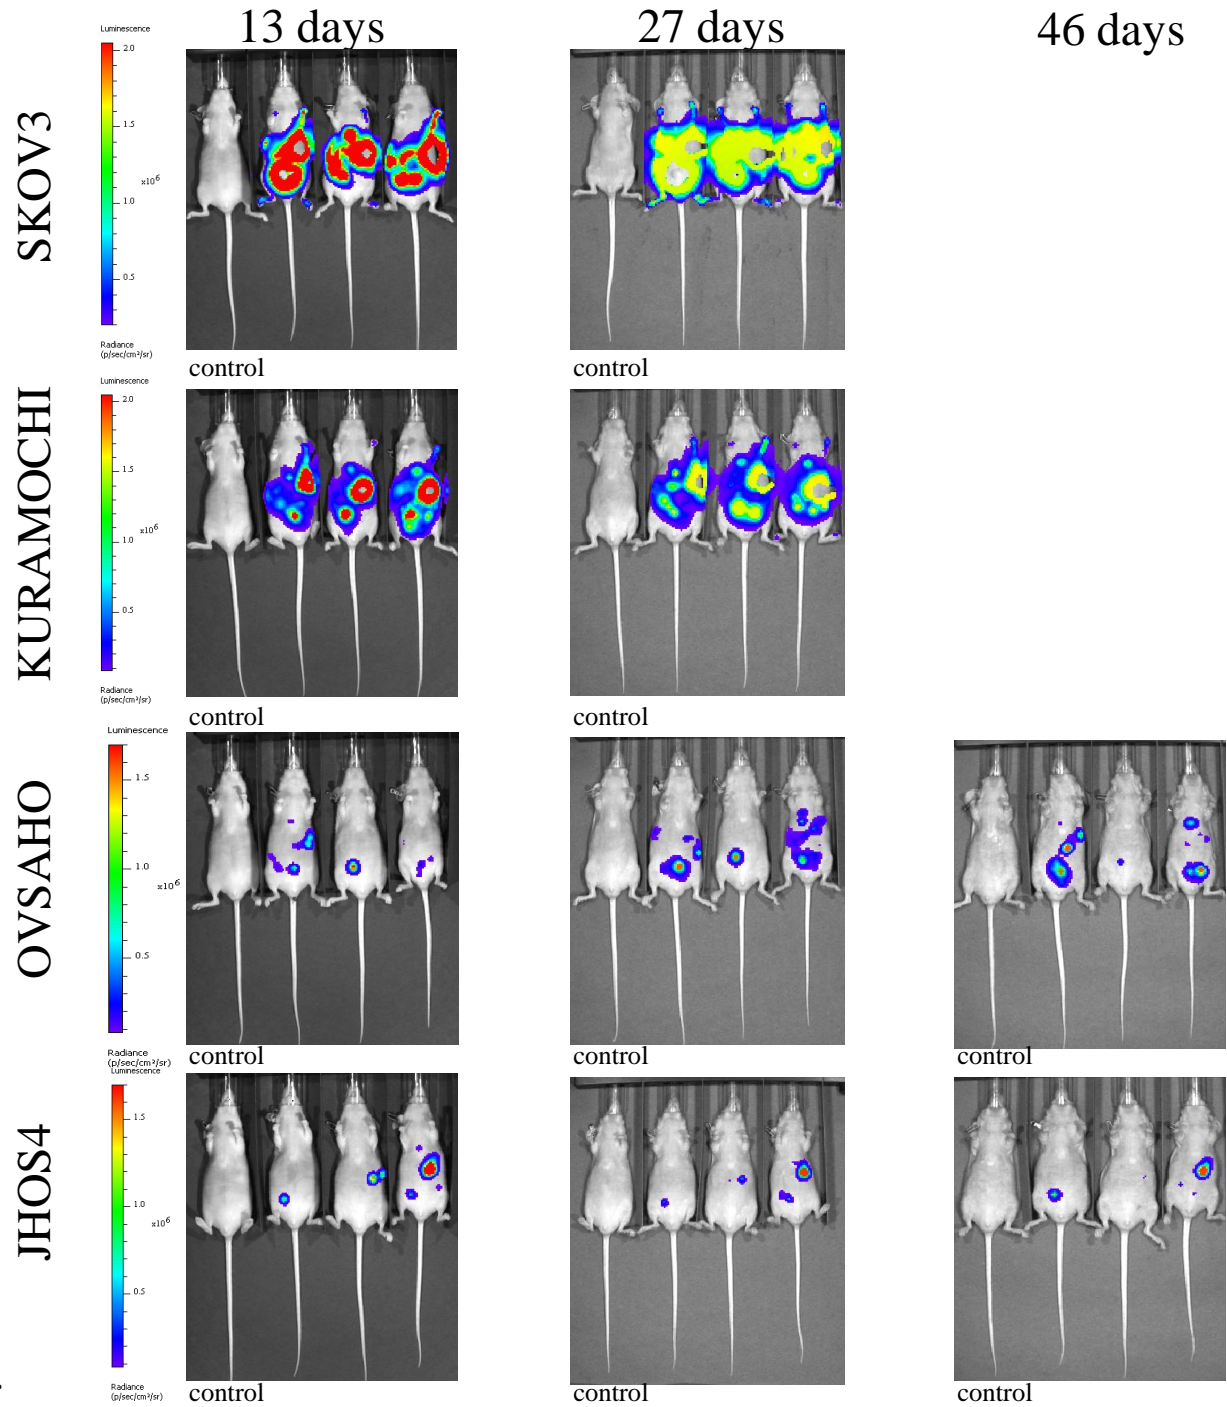

Figure S2.

### SKOV3

### KURAMOCHI

### OVSAHO

A

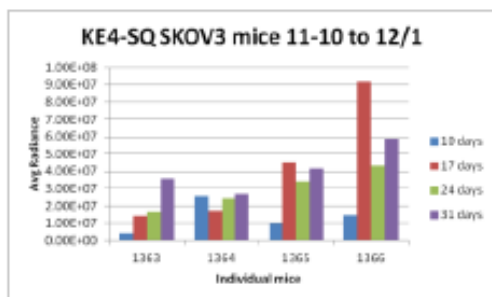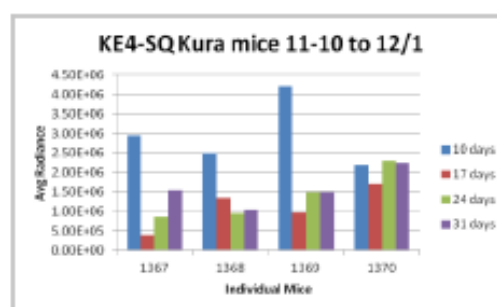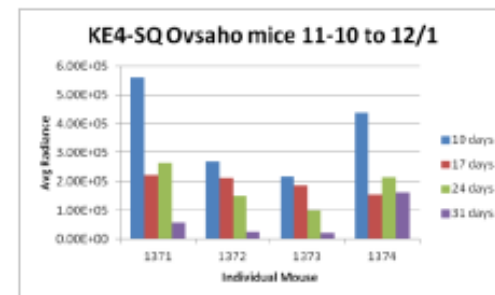

B

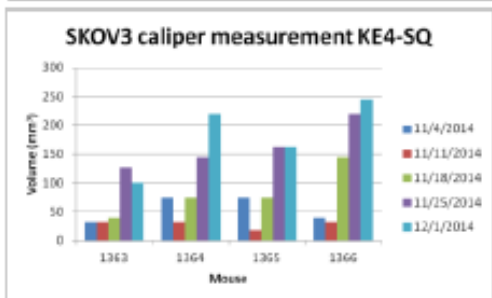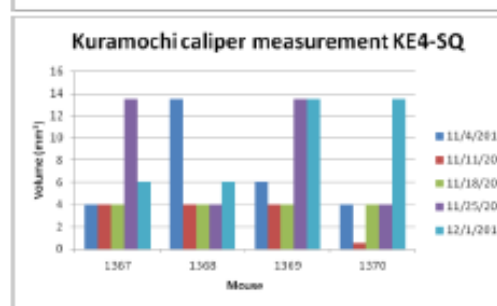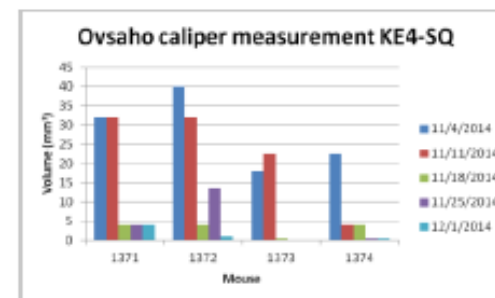

Figure S3.

Supplement: NIHMS720562-supplement-3.pdf [file NIHMS720562-supplement-3.pdf]
